# Supplementary material
Source: publisher figshare collection journal article supplement (https://tandf.figshare.com/ndownloader/files/30824694)
Supplement: Supplementary file 1 [file 30824694]

| **Appendix C. CTCAE v.4.0 Genito-Urinary and Sexual Morbidity** | | | | | | | | |
| --- | --- | --- | --- | --- | --- | --- | --- | --- |
| **CTCAE v.4.0,**  **grade 2+** | **Baseline (N=74-85)** | **Post RT (N=76-85)** | **3 months (N=74-87)** | **6 months (N=76-88)** | **12 months (N=75-85)** | **24 months (N=67-81)** | **36 months (N=69-78)** | **60 months (N=52-58)** |
| Overall, GU morbidity | 7(8) | 23(27)# | 13(15) | 7(8) | 7(8) | 9(11) | 7(9) | 8(13) |
| Urinary tract infections | 1(1) | 6(7) | 4(5) | 2(2) | 4(5) | 1(1) | 2(3) | 3(6) |
| Bladder spasm | 0 | 8(10)# | 1(1) | 1(1) | 0 | 0 | 0 | 1(2) |
| Hematuria | 0 | 0 | 0 | 0 | 0 | 0 | 0 | 0 |
| Urinary frequency | 2(3) | 12(16)# | 8(11) | 6(8) | 5(7) | 6(9) | 4(6) | 3(6) |
| Urinary incontinence | 1(1) | 1(1) | 1(1) | 1(1) | 0 | 1(1) | 2(3) | 4(7) |
| Urinary retention | 5(7) | 5(7) | 1(1) | 3(4) | 3(4) | 4(5) | 3(4) | 0 |
| Urinary urgency | 1(1) | 6(8) | 3(4) | 1(1) | 1(1) | 0 | 1(1) | 2(4) |
| **Sexual** |  |  |  |  |  |  |  |  |
| Erectile dysfunction | 30(39) | 46(58)# | 56(69)# | 61(71)# | 57(69)# | 58(73)# | 50(71)# | 31(58)# |
| Decreased libido | 18(24) | 35(46)# | 38(51)# | 38(50)# | 42(56)# | 42(60)# | 35(52)# | 18(35) |
| Fatigue | 1(1) | 13(15)# | 2(2) | 3(3) | 2(2) | 3(4) | 3(4) | 2(4) |
| Anorexia | 1(1) | 2(2) | 0 | 2(2) | 2(2) | 0 | 0 | 0 |
| Numbers in () are percentages. # significant compared to baseline (p<0.05) | | | | | | | | |
